# Supplementary material for: A metal-assisted templating route (S0M+I−) for fabricating thin-layer CoO covered on the channel of nanospherical-HMS with improved catalytic properties
Source: Royal Society of Chemistry journal article supplement (doi:10.1039/c5dt04451k), 2016-01-01
Supplement: c5dt04451k1.pdf [file c5dt04451k1.pdf]

***Electronic supplementary information (ESI)***

**Metal-assisted templating route (S<sup>0</sup>M<sup>+</sup>I-) for fabricating thin-layer  
CoO covered on the channel of nanospherical-HMS with  
enhanced catalytic properties**

Fu Yang, Shijian Zhou, Haiqing Wang, Saifu Long, Xianfeng Liu, Yan Kong\*

*State Key Laboratory of Materials-Oriented Chemical Engineering, College of Chemistry and  
Chemical Engineering, Nanjing Tech University, Nanjing 210009, Jiangsu, P. R. China*

\*Corresponding author, E-mail: kongy36@njtech.edu.cn (Y. Kong), Tel: (86)-25-  
83587860.

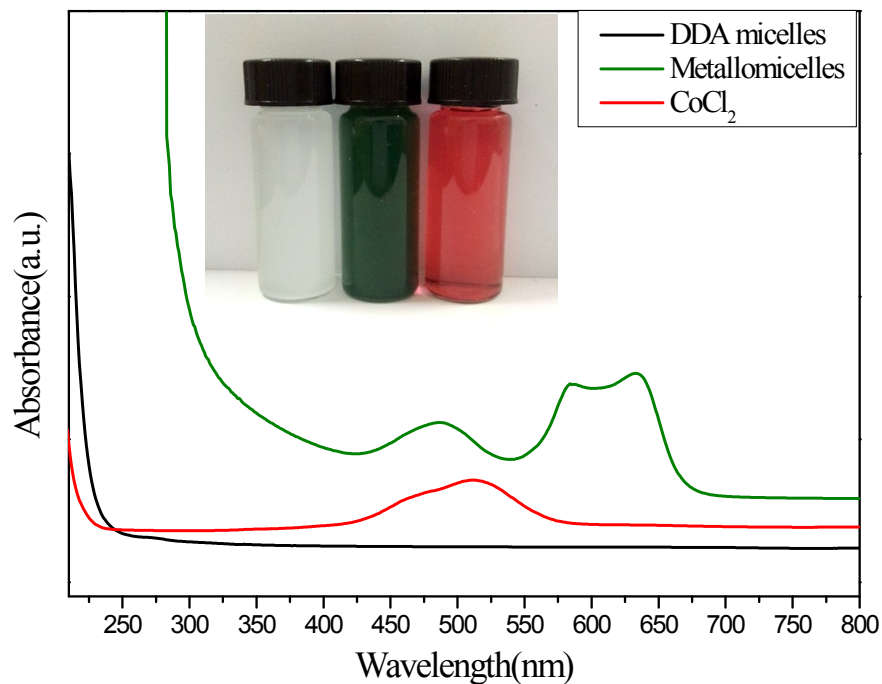

**Fig. S1.** UV-visible absorption spectra of raw micelles, cobalt chloride and metallomicelles solutions, and the digital photos (insert) of DDA micelles (a), metallomicelles (b) and CoCl<sub>2</sub> (c) solutions.

**Table S1** pH value for metallization of micelle systems

| Samples     | Co <sup>2+</sup> /DDA <sup>a</sup> | pH   |
|-------------|------------------------------------|------|
| Raw micelle | 0                                  | 11.4 |
| Micelle-1Co | 1                                  | 10.2 |
| Micelle-2Co | 2                                  | 9.3  |
| Micelle-3Co | 3                                  | 8.6  |
| Micelle-4Co | 4                                  | 8.0  |

<sup>a</sup>molar ratio

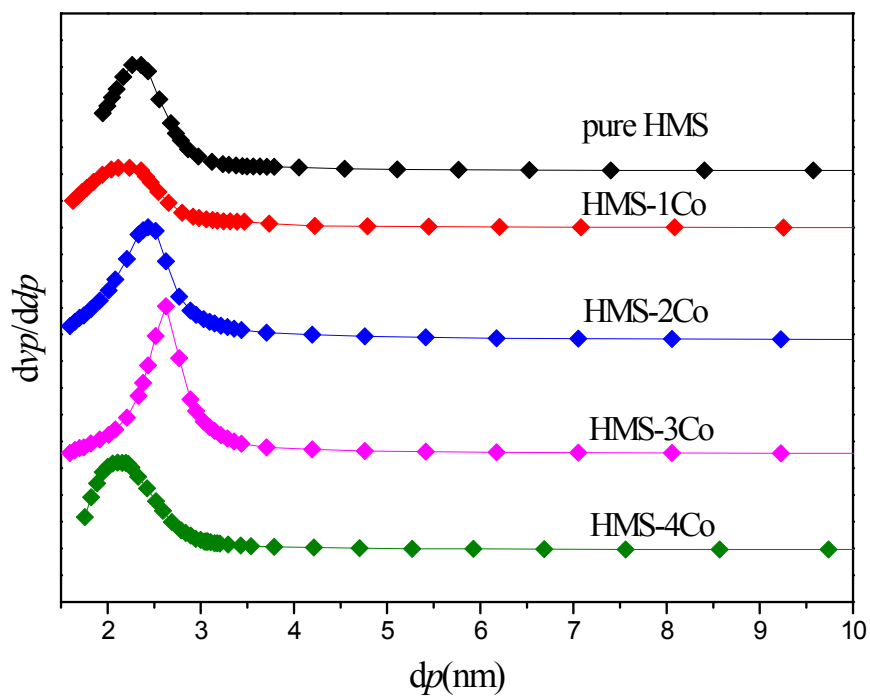

**Fig. S2.** Pore size distribution of pure HMS and series samples of HMS-xCo

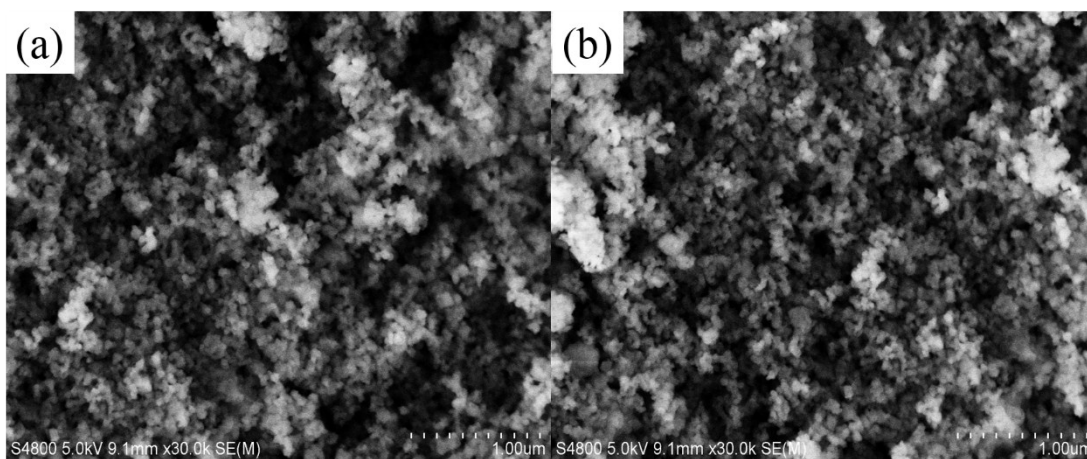

**Fig. S3** the SEM images of the sample of HMS-3Co

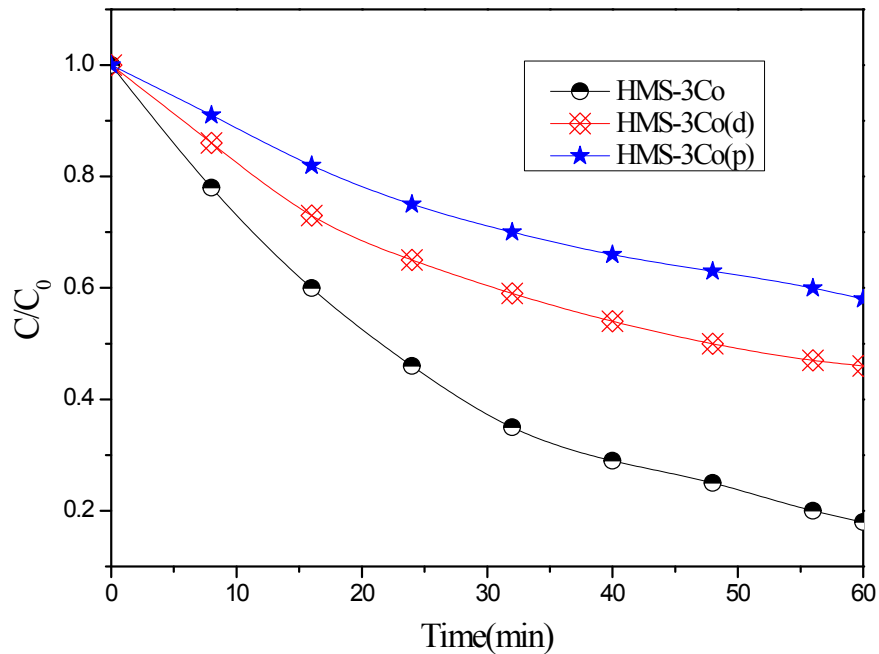

**Fig. S4**  $C/C_0$  versus reaction time for the oxidation of phenol at 270 nm using HMS-3Co, HMS-3Co (d) and HMS-3Co (p) for comparison.

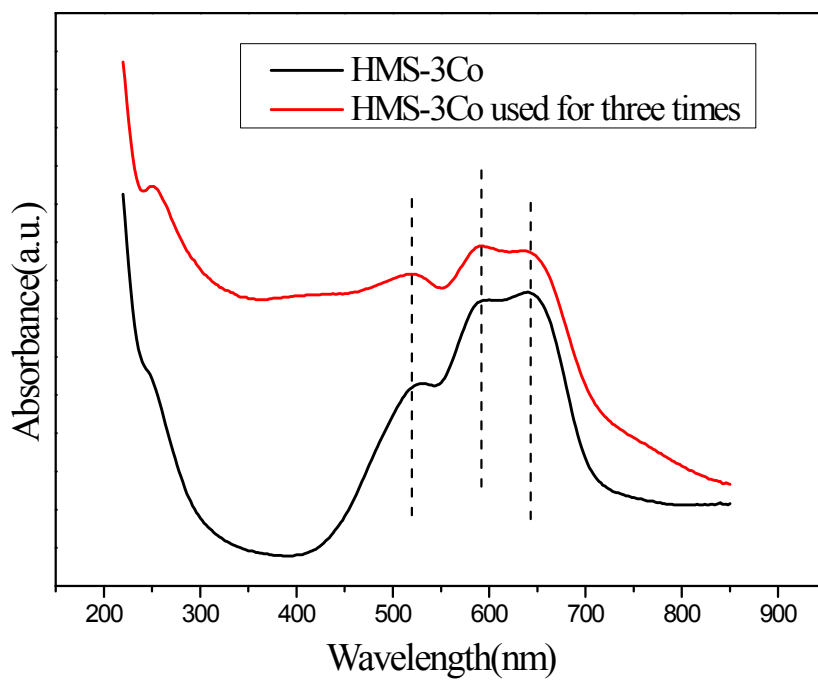

**Fig. S5** DRUV-vis spectra for the sample of HMS-3Co and HMS-3Co used for three times
